# Supplementary material
Source: HighWire-hosted journal article supplement (https://bmjopen.bmj.com/content/15/2/e090736)
Supplement: inline-supplementary-material-1 [file inline-supplementary-material-1.pdf]

### *Analysis of summary TOPS Scores*

For psychological health (Figure S1a), physical health (Figure S1b) and QoL (Figure S1c) there were significantly greater health/QoL reports if people were prescribed LAIB (vs other MOUD):  $t(382.77) = 3.00$   $p < .001$ ,  $d = .30$ ,  $t(385) = 4.41$ ,  $p < .001$ ,  $d = .44$ ) and  $t(383) = 2.60$ ,  $p < .001$ ,  $d = .26$ ) respectively.

*Supplemental Figure 1: Psychological health (S1a), physical health (S1b) and Quality of Life (S1c) in LAIB vs. compared to oral MOUD.*

In adjusted models the variables explained approximately 7% (Adjusted  $R^2 = 0.07$ ) of variance in psychological health. LAIB was a significant positive predictor ( $B = .081$  [95% CI: 0.16 to 1.46],  $p = .015$ ), as was regular employment ( $B = 1.21$  [95% CI: 0.42 to 2.01],  $p = .003$ ), and being male ( $B = 1.23$  [95% CI: 0.49 to 1.97],  $p = .001$ ). Approximately 12% of variance was explained in physical health (Adjusted  $R^2 = 0.12$ ). LAIB was a significant positive predictor ( $B = 0.85$  [95% CI: 0.21 to 1.49],  $p = .009$ ), as was regular employment ( $B = 1.33$  [95% CI: 0.54 to 2.12],  $p = .001$ ) and being male ( $B = 1.09$  [95% CI: 0.36 to 1.82],  $p = .004$ ). Age was a negative predictor of physical health ( $B = -0.06$  [95% CI: -0.09 to -0.02],  $p = .001$ ). Approximately 11% of variance was explained in QoL (Adjusted  $R^2 = .11$ ). LAIB was a significant positive predictor ( $B = 0.77$  [95% CI: 0.13 to 1.42],  $p = .019$ ), as was regular employment ( $B = 1.80$  [95% CI: 1.01 to 2.59],  $p < .001$ ), being male ( $B = 1.04$  [95% CI: 0.31 to 1.77],  $p = .006$ ) and age of first substance use ( $B = 0.05$  [95% CI: 0.01 to 0.08],  $p = .025$ ). The number of episodes was a negative predictor of QoL ( $B = -0.35$  [95% CI: -0.04 to -0.65],  $p = .027$ ).

Supplemental Table 1

|                                          | Psychological Health |              |              | Physical Health |               |              | Quality of Life |               |                  |
|------------------------------------------|----------------------|--------------|--------------|-----------------|---------------|--------------|-----------------|---------------|------------------|
| Predictors                               | Estimates            | CI           | p            | Estimates       | CI            | p            | Estimates       | CI            | p                |
| LAIB [Yes]                               | 0.81                 | 0.16 – 1.46  | <b>0.015</b> | 0.85            | 0.21 – 1.49   | <b>0.009</b> | 0.77            | 0.13 – 1.42   | <b>0.019</b>     |
| Age                                      | 0.00                 | -0.03 – 0.04 | 0.791        | -0.06           | -0.09 – -0.02 | <b>0.001</b> | -0.00           | -0.04 – 0.03  | 0.947            |
| Employment<br>[Regular Employment]       | 1.21                 | 0.42 – 2.01  | <b>0.003</b> | 1.33            | 0.54 – 2.12   | <b>0.001</b> | 1.80            | 1.01 – 2.59   | <b>&lt;0.001</b> |
| Ethnicity [white]                        | -0.58                | -1.37 – 0.21 | 0.149        | -0.53           | -1.31 – 0.24  | 0.178        | -0.38           | -1.15 – 0.40  | 0.344            |
| Age of first substance                   | 0.03                 | -0.01 – 0.07 | 0.168        | 0.03            | -0.01 – 0.07  | 0.136        | 0.05            | 0.01 – 0.08   | <b>0.025</b>     |
| Number of episodes                       | -0.23                | -0.54 – 0.08 | 0.147        | -0.23           | -0.54 – 0.07  | 0.132        | -0.35           | -0.65 – -0.04 | <b>0.027</b>     |
| Gender [Male]                            | 1.23                 | 0.49 – 1.97  | <b>0.001</b> | 1.09            | 0.36 – 1.82   | <b>0.004</b> | 1.04            | 0.31 – 1.77   | <b>0.006</b>     |
| IMD                                      | -0.03                | -0.16 – 0.11 | 0.693        | -0.05           | -0.18 – 0.08  | 0.430        | -0.08           | -0.21 – 0.05  | 0.227            |
| R <sup>2</sup> / R <sup>2</sup> adjusted | 0.102 / 0.081        |              |              | 0.144 / 0.124   |               |              | 0.131 / 0.111   |               |                  |
